# Supplementary material
Source: PubMed Central journal article supplement (PMC3726575)

**A**

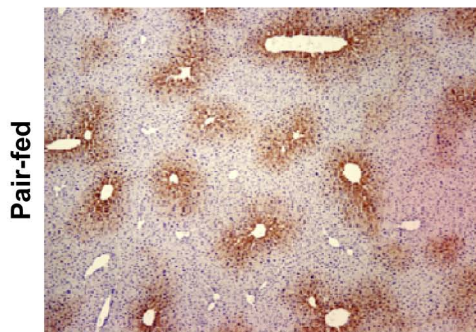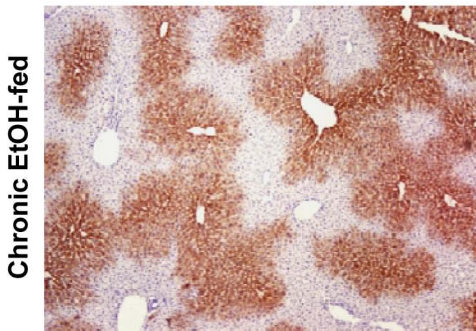

**B**

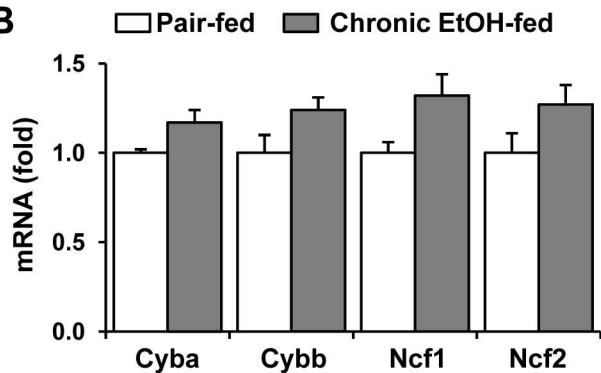

**C**

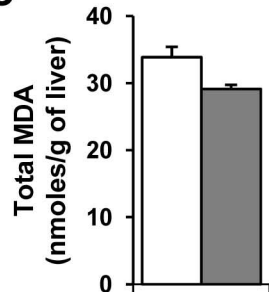

**D**

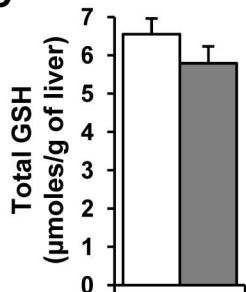

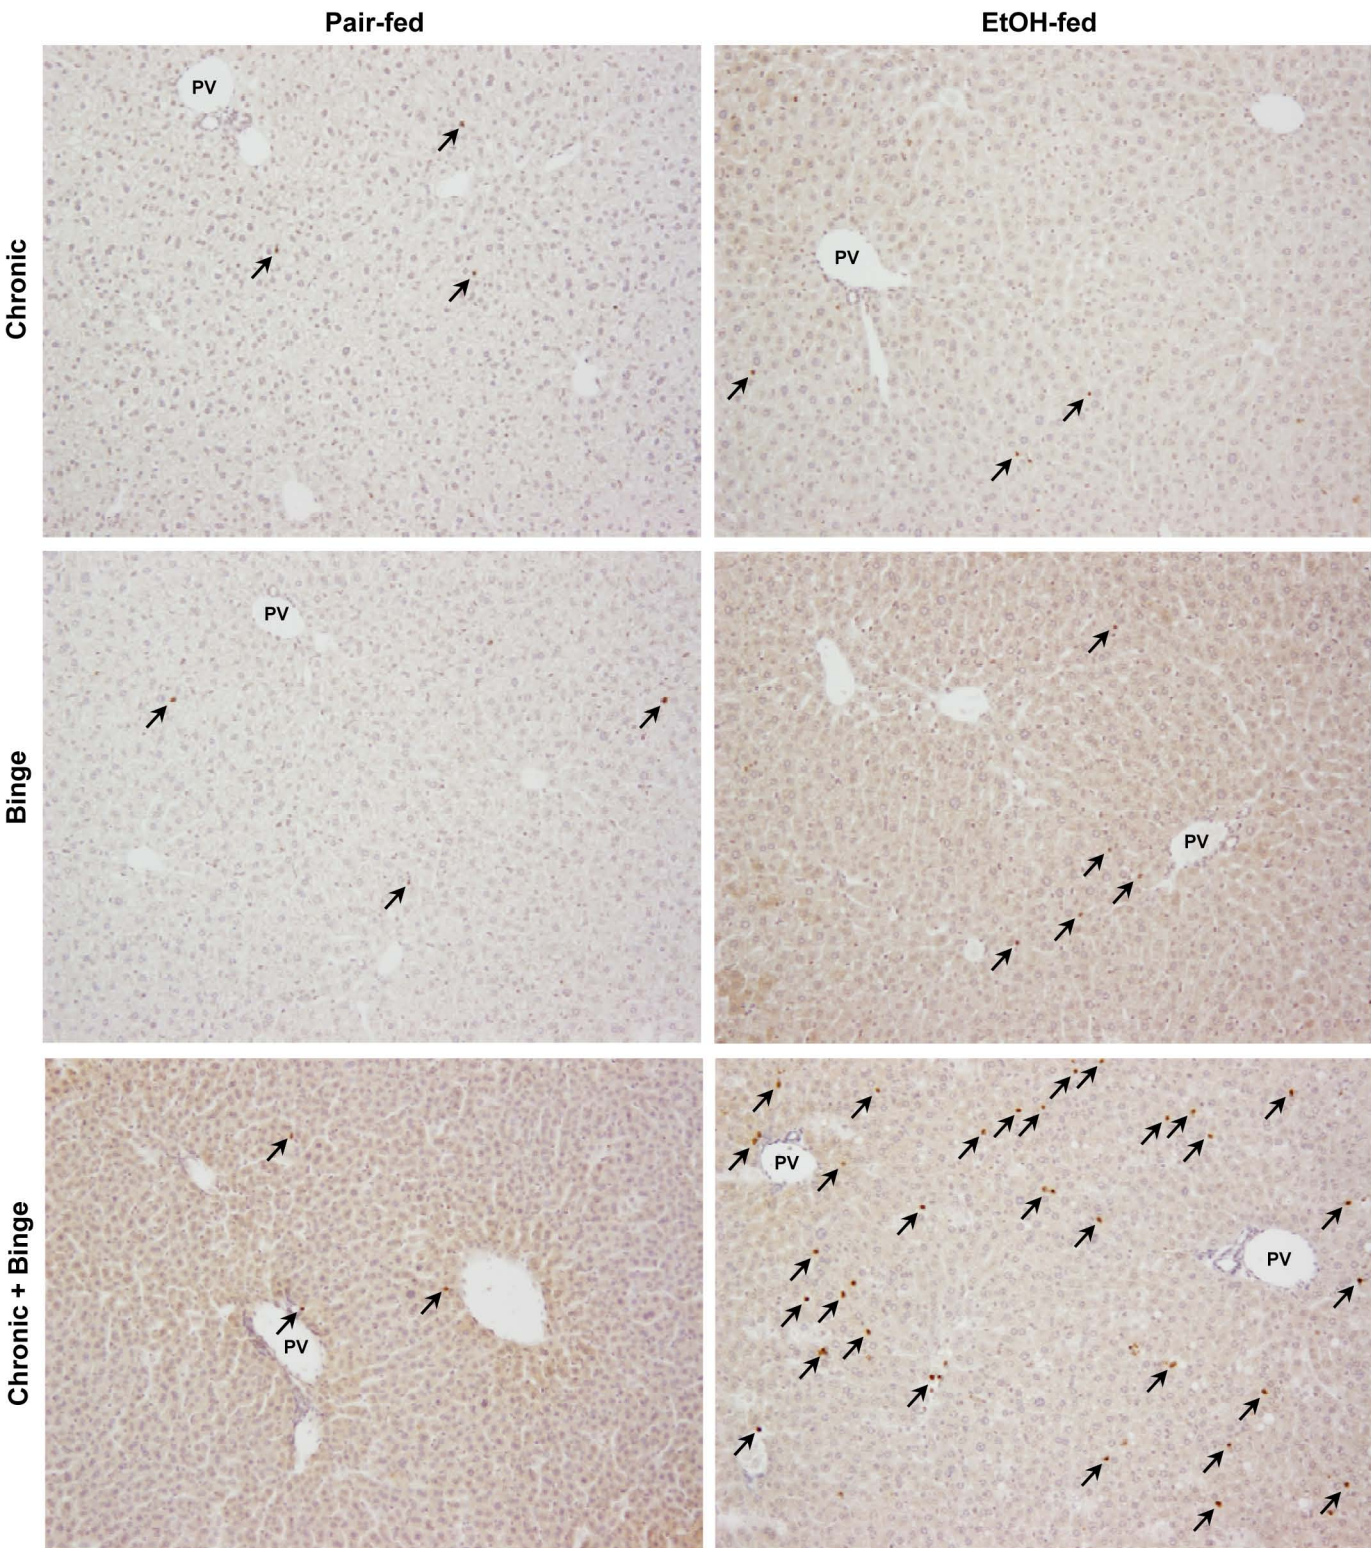

Bertola et al.: supporting Fig. 2B

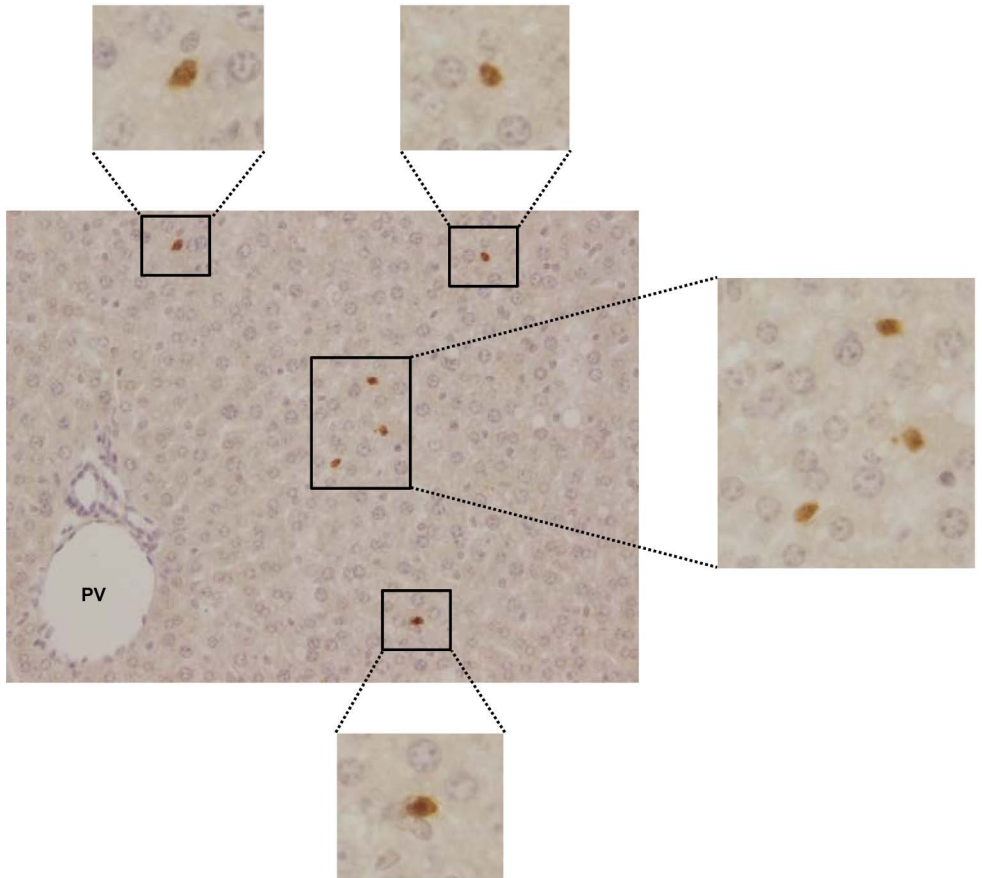

Bertola et al.: supporting Fig. 2C

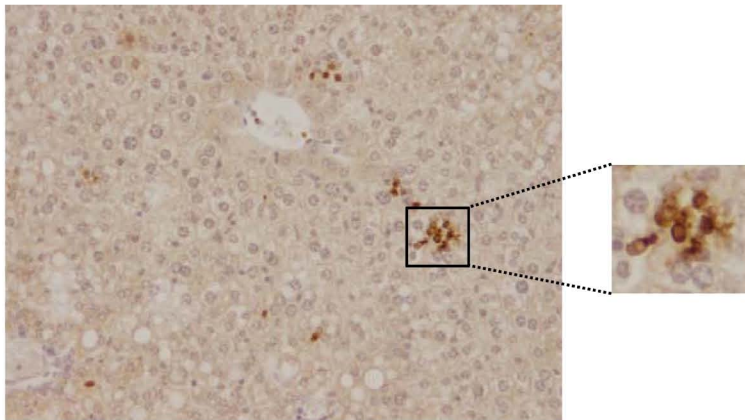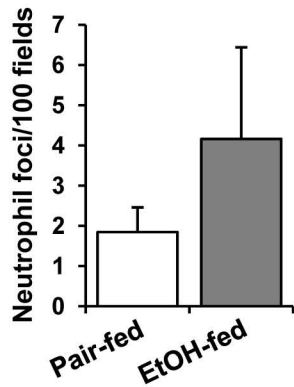

Bertola et al.: supporting Fig. 3

**A**

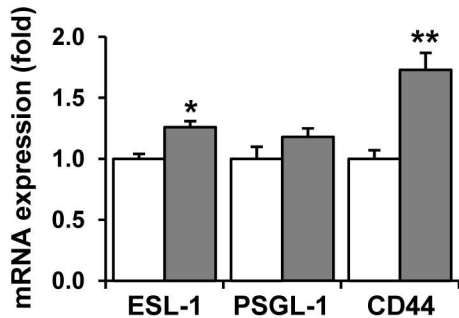

**B**

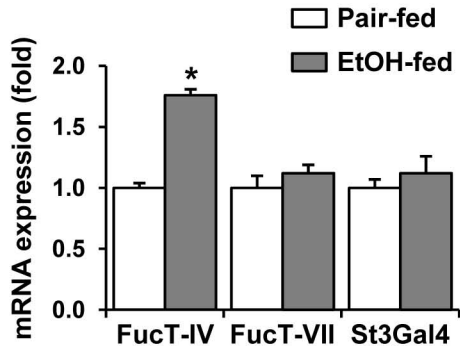

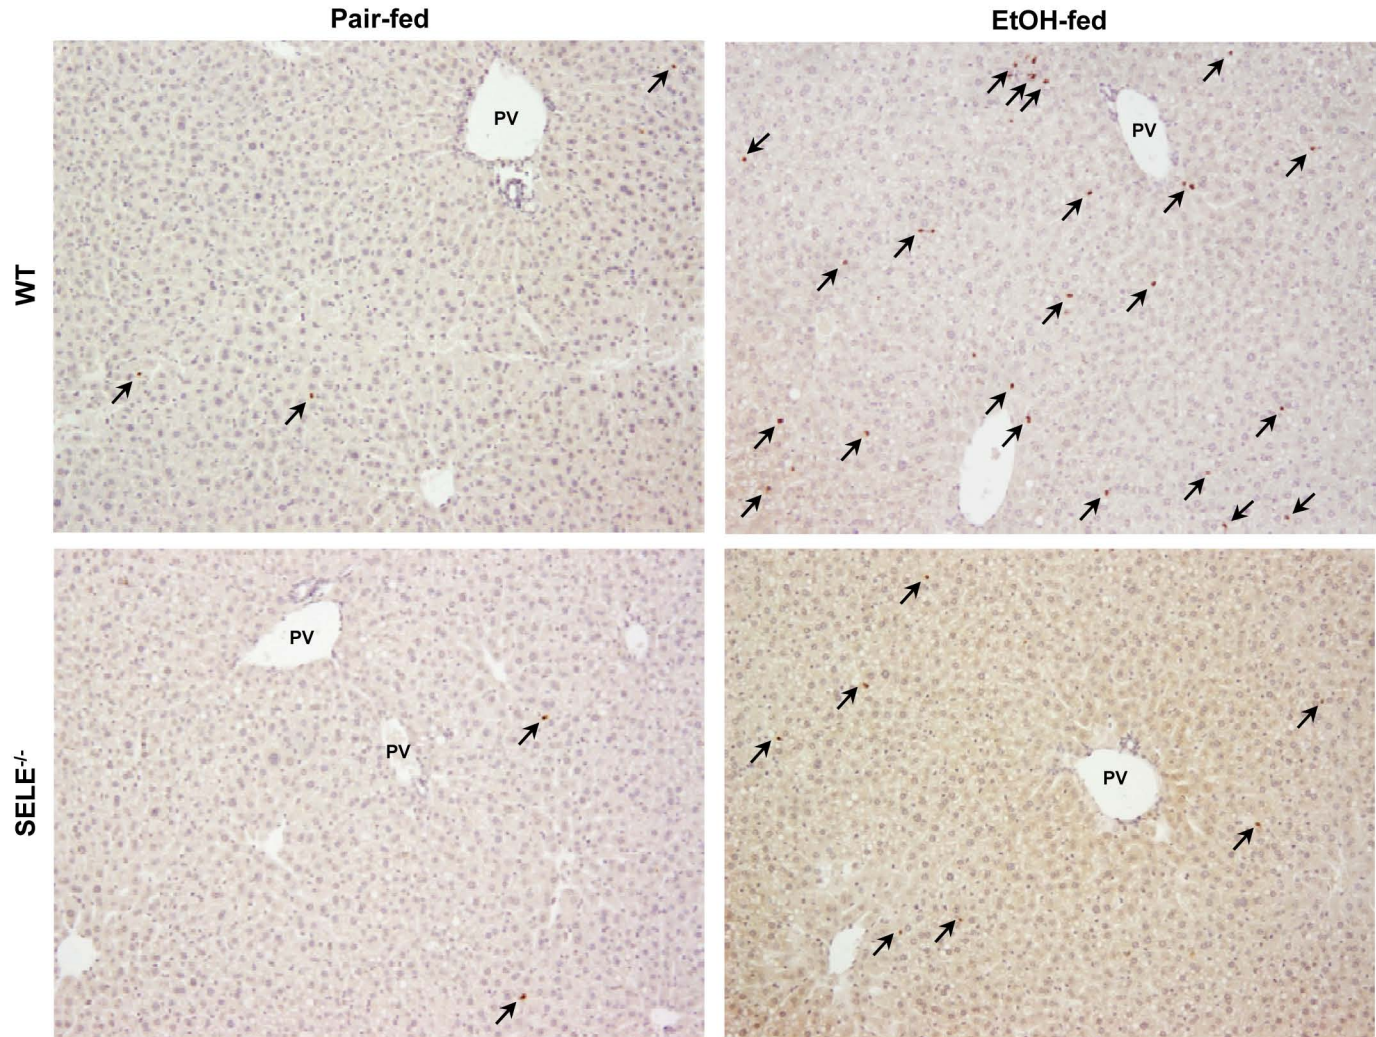

Bertola et al.: supporting Fig. 5

Pair-fed

EtOH-fed

WT

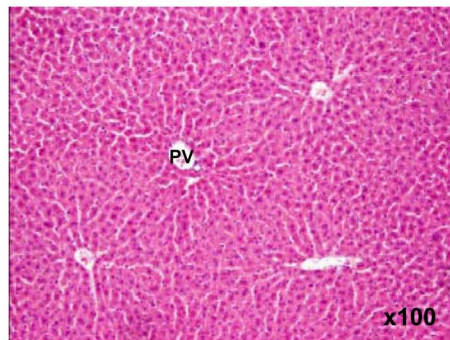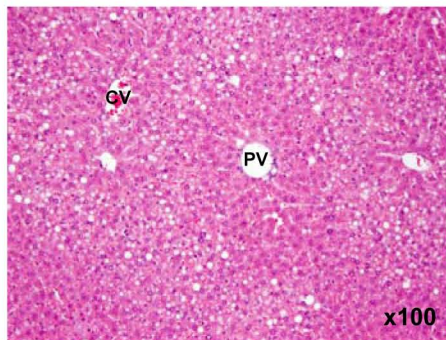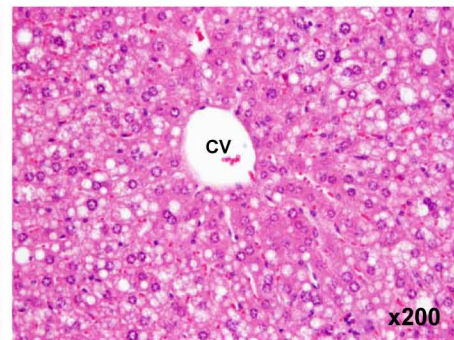

SELE<sup>-/-</sup>

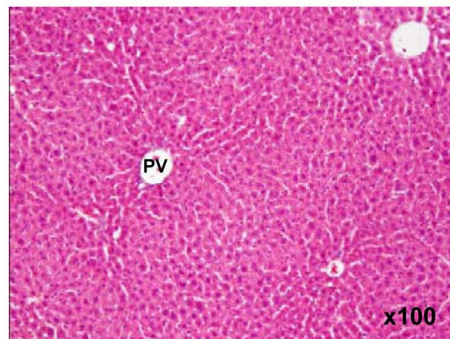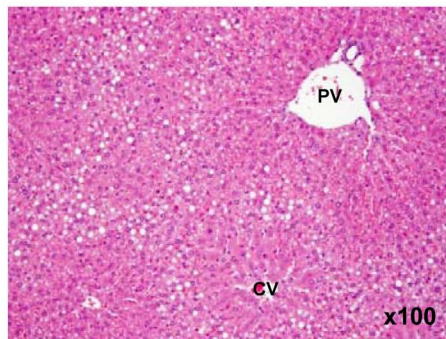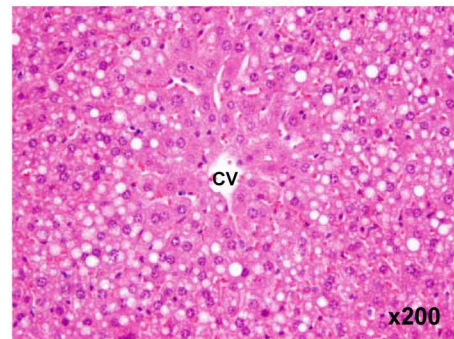

Bertola et al.: supporting Fig. 6

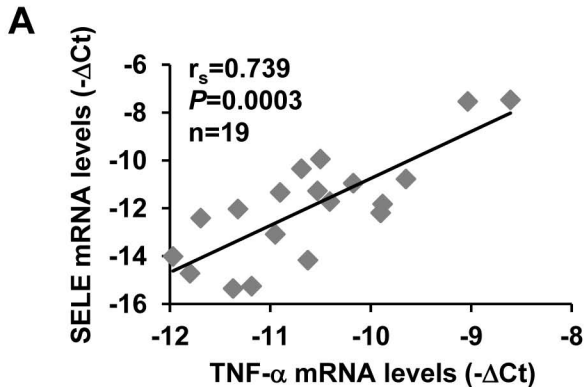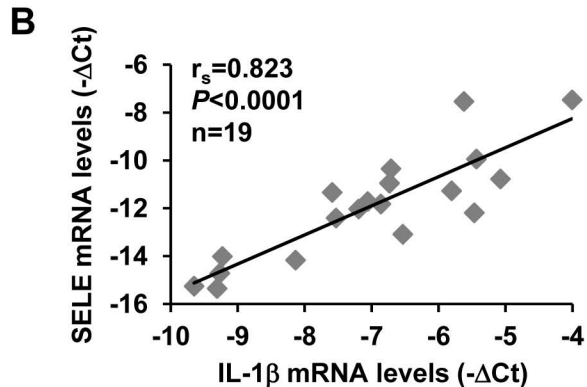



Bertola et al.: supporting Fig. 7

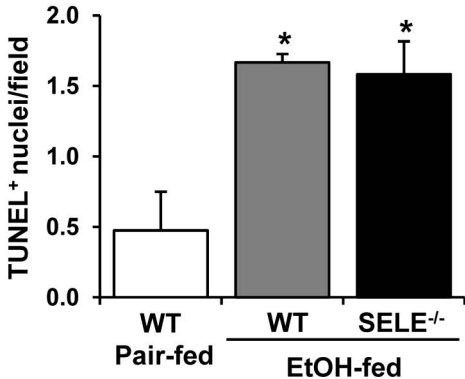

Supplement: NIHMS460777-supplement-Supp_Fig_S1-S7.pdf [file NIHMS460777-supplement-Supp_Fig_S1-S7.pdf]
